# Supplementary material for: CENP-32 is required to maintain centrosomal dominance in bipolar spindle assembly
Source: PubMed Central journal article supplement — Mol Biol Cell. 2015 Apr 1;26(7):1225–37. doi: 10.1091/mbc.E14-09-1366 (PMC4454171; doi:10.1091/mbc.e14-09-1366), 2015-04-01
Supplement: supp_E14-09-1366v1_CombinedSupMats.pdf [file supp_E14-09-1366v1_CombinedSupMats.pdf]

# Supplemental Materials

*Molecular Biology of the Cell*

Ohta et al.

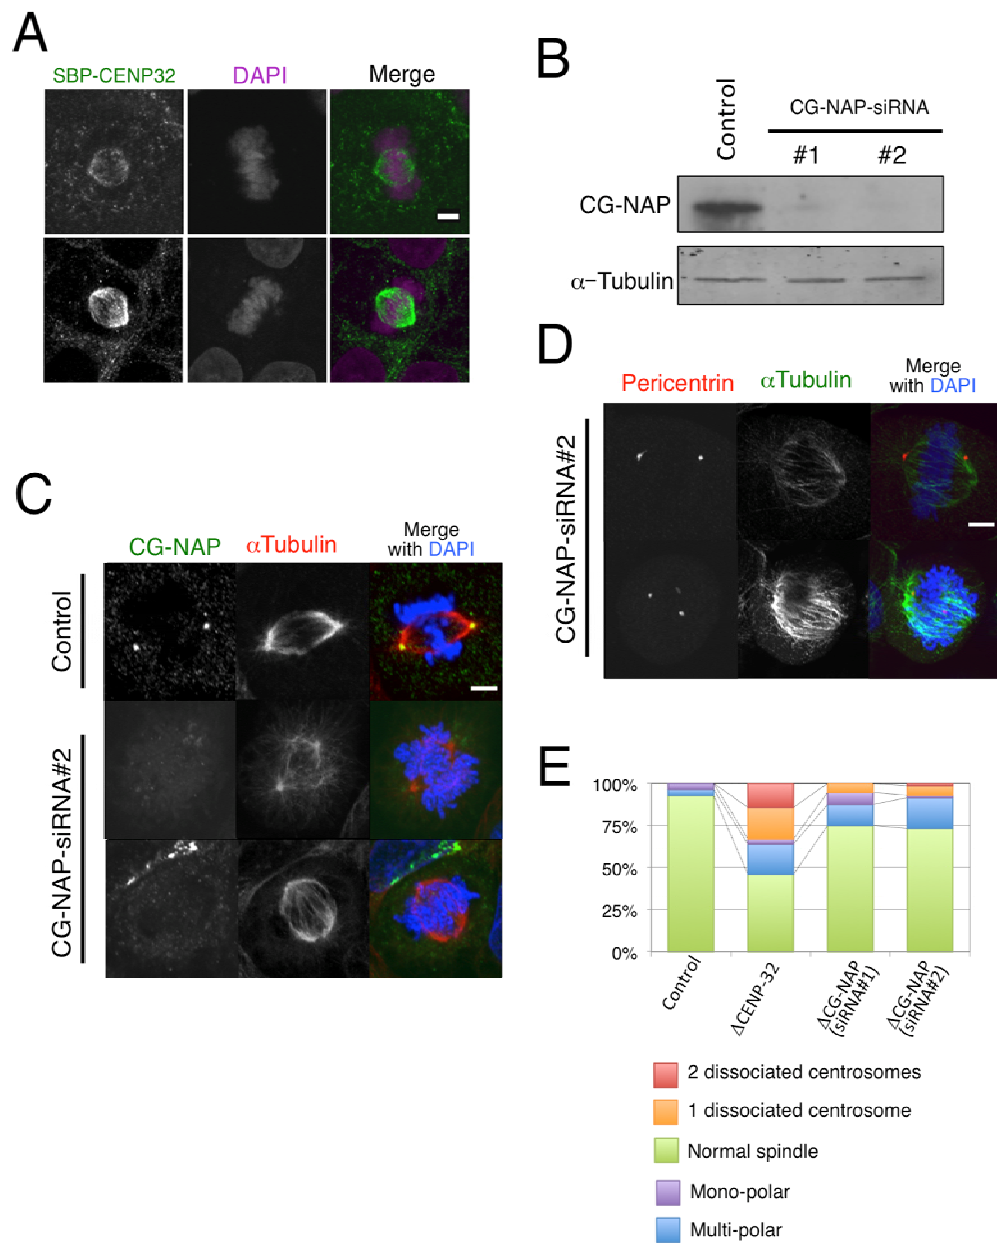

Fig. S1

**Supplementary Fig. 1 (A)** SBP-CENP-32 (green) can accumulate on mitotic spindles including kinetochores and centrosomes. **(B)** Immunoblots of control and CENP-32 siRNA transfected cell extracts. **(C)** CG-NAP siRNA transfection results in CG-NAP mislocalization at

centrosomes. CG-NAP (green),  $\alpha$ -tubulin (red), and merged with DAPI (blue). **(D)** Centrosome dissociation phenotype caused by CG-NAP depletion. **(E)** Quantification of centrosome dissociation phenotype in CG-NAP knockdown cells.

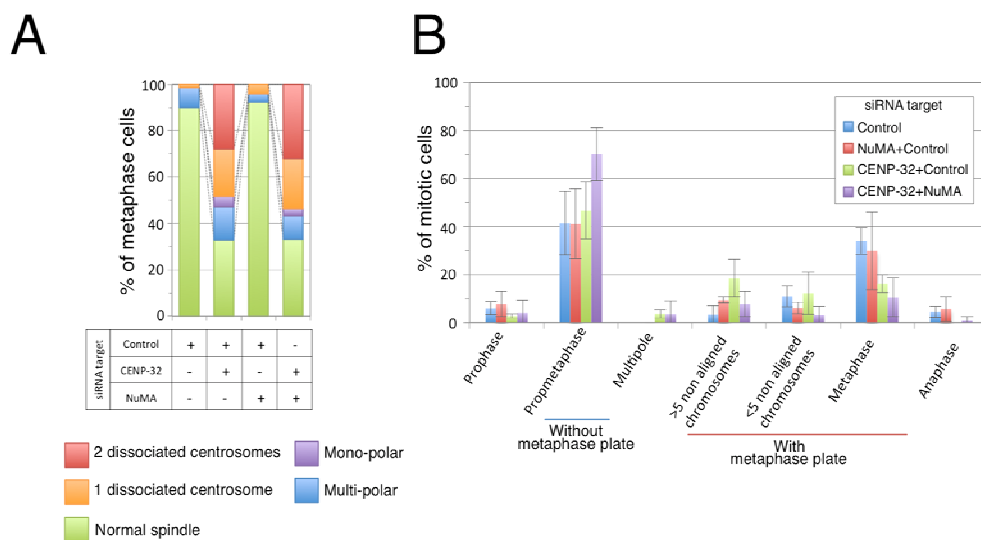

Fig. S2

**Supplementary Fig. 2 (A)** Quantification of the centrosome dissociation phenotype in NuMA and CENP-32-depleted metaphase.

**(B)** Quantification of mitotic profile in NuMA and CENP-32-depleted cells.

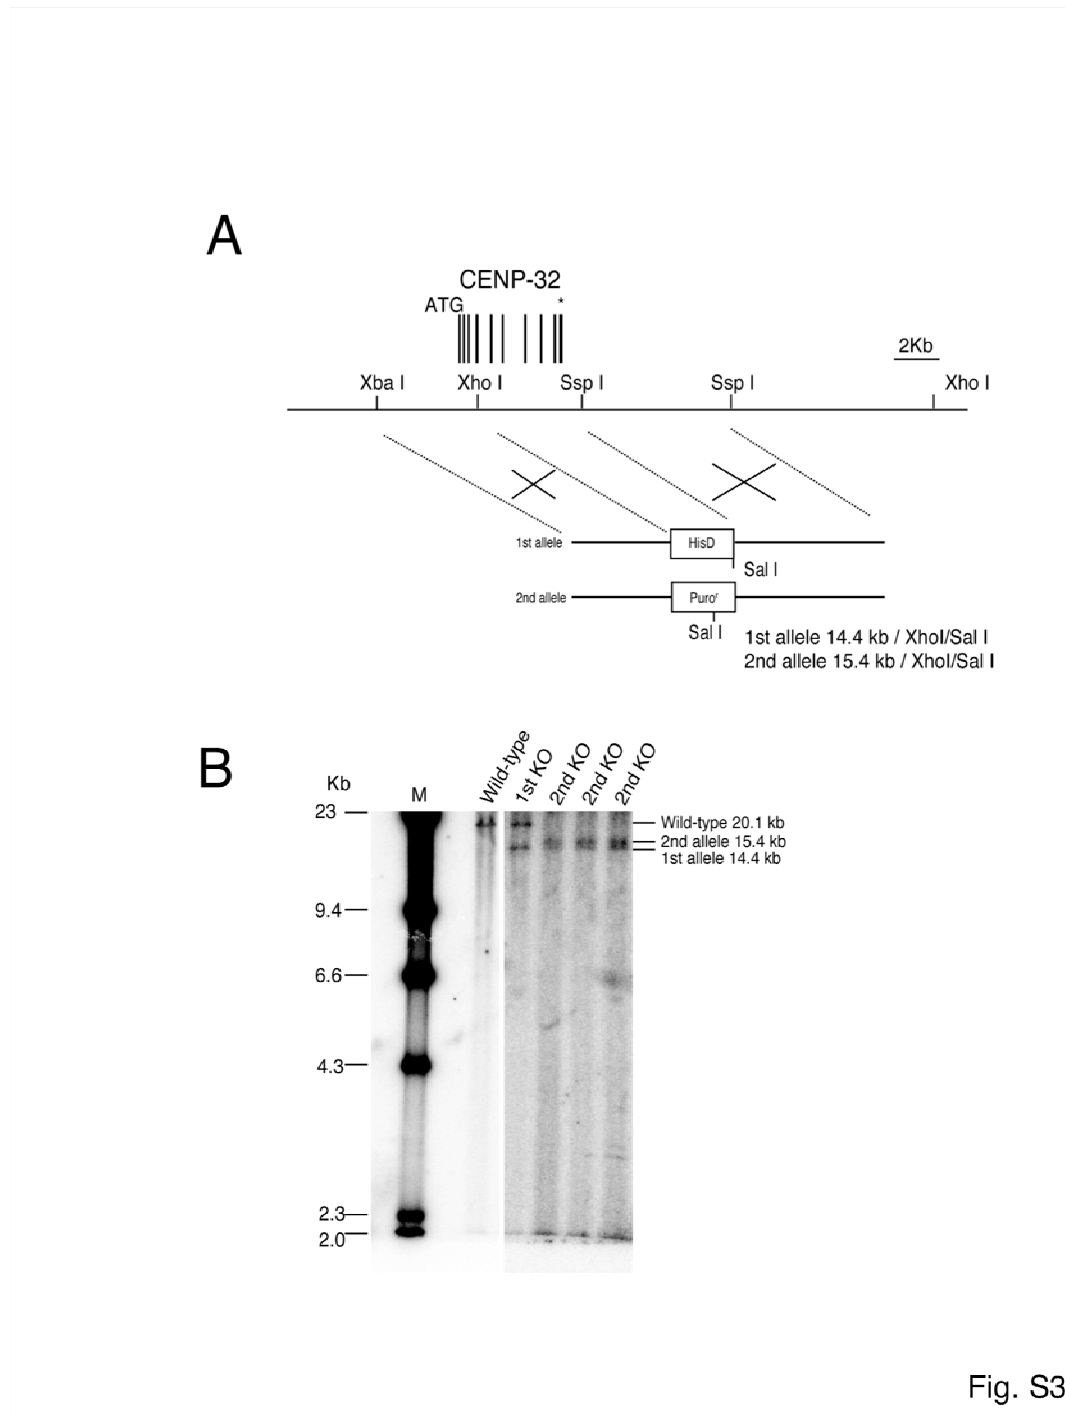

**Supplementary Fig. 3** Generation of a knock-out cell line **(A)** Restriction maps of the chicken CENP-32 locus, gene disruption constructs, and targeted loci. Black boxes indicate the positions of exons. *SspI*, *XbaI*, and *XhoI* restriction sites are shown. There is a *Sall* polymorphism in this locus; a *Sall* site is absent from the 1st round targeted allele. **(B)** Novel 14.4 and 15.4 kb *Sall* fragments hybridize to the probe if targeted integration of the construct occurs.

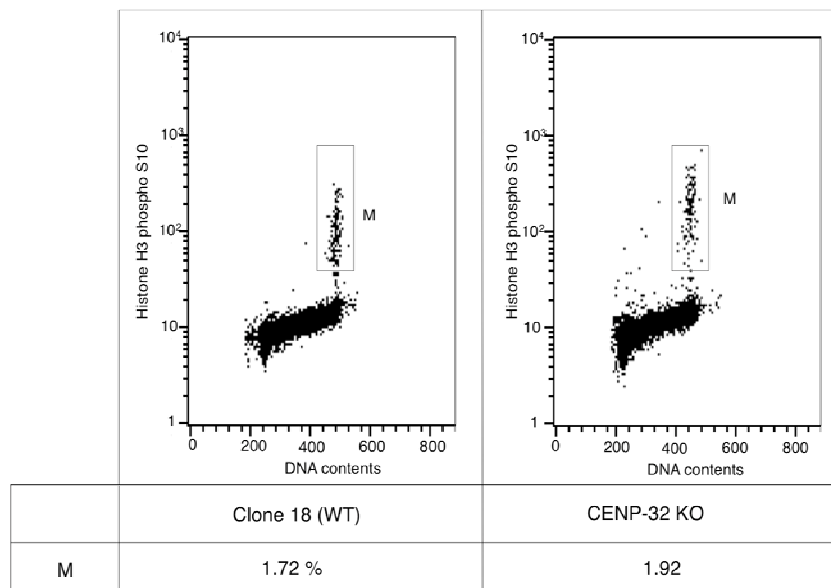

Fig. S4

**Supplementary Fig. 4** Histone H3 phospho-S10 plots are analyzed by fluorescence activated cell sorting. The windows for separated M-phase are indicated. Quantification is shown at the bottom.
